# Supplementary material
Source: HighWire-hosted journal article supplement (https://www.canjsurg.ca/highwire/filestream/96785/field_highwire_adjunct_files/2/54-1-25-app3.pdf)
Supplement: 54-1-25-app3.pdf [file 54-1-25-app3.pdf]

**Appendix 3: 15 work-related problems rank list**

Please rate the following 15 work-related items using the following scale:  
Circle **ONE** per item only

- 0= not a problem
- 1= little bit of a problem
- 2= a moderate problem
- 3= quite a problem
- 4= extreme problem

|                                     |   |   |   |   |   |
|-------------------------------------|---|---|---|---|---|
| 1. Learning everything              | 0 | 1 | 2 | 3 | 4 |
| 2. Feeling rushed                   | 0 | 1 | 2 | 3 | 4 |
| 3. Being on call                    | 0 | 1 | 2 | 3 | 4 |
| 4. Self-doubt                       | 0 | 1 | 2 | 3 | 4 |
| 5. Fear of error                    | 0 | 1 | 2 | 3 | 4 |
| 6. No time for needy patient        | 0 | 1 | 2 | 3 | 4 |
| 7. Frustration                      | 0 | 1 | 2 | 3 | 4 |
| 8. Death of patient                 | 0 | 1 | 2 | 3 | 4 |
| 9. Conflict between patients        | 0 | 1 | 2 | 3 | 4 |
| 10. Program problems                | 0 | 1 | 2 | 3 | 4 |
| 11. Status as a resident            | 0 | 1 | 2 | 3 | 4 |
| 12. Problems with other specialties | 0 | 1 | 2 | 3 | 4 |
| 13. Sleep problems                  | 0 | 1 | 2 | 3 | 4 |
| 14. Faculty problems                | 0 | 1 | 2 | 3 | 4 |
| 15. Resident problems               | 0 | 1 | 2 | 3 | 4 |
